# Supplementary material for: I-HEDGE: determining the optimum complementary sets of taxa for conservation using evolutionary isolation
Source: PeerJ journal article supplement (doi:10.7717/peerj.2350), 2016-08-23
Supplement: Supplemental_Table_S1.pdf [file Supplemental_Table_S1.pdf]

**I-HEDGE: Determining the optimum complementary sets of taxa for conservation using evolutionary isolation**

Evelyn L. Jensen, Arne Ø. Mooers, Adalgisa Caccone, and Michael A. Russello

**Table S1.** Pairwise values of  $\phi_{ST}$  among species, calculated using the Kimura 2-parameter model.

Each value is significant at  $p < 0.001$ , except between *darwini* and *becki*, which is significant at  $p < 0.05$ .

|                     | <i>darwini</i> | <i>donfaustoi</i> | <i>hoodensis</i> | <i>porteri</i> | <i>becki</i> | <i>abingdoni</i> | <i>ephippium</i> | <i>chathamensis</i> | <i>vandenburghi</i> | <i>microphyes</i> | <i>nigra</i> | <i>vicina</i> |
|---------------------|----------------|-------------------|------------------|----------------|--------------|------------------|------------------|---------------------|---------------------|-------------------|--------------|---------------|
| <i>darwini</i>      | 0.00           |                   |                  |                |              |                  |                  |                     |                     |                   |              |               |
| <i>donfaustoi</i>   | 0.92           | 0.00              |                  |                |              |                  |                  |                     |                     |                   |              |               |
| <i>hoodensis</i>    | 0.91           | 1.00              | 0.00             |                |              |                  |                  |                     |                     |                   |              |               |
| <i>porteri</i>      | 0.84           | 0.91              | 0.93             | 0.00           |              |                  |                  |                     |                     |                   |              |               |
| <i>becki</i>        | 0.11           | 0.92              | 0.92             | 0.87           | 0.00         |                  |                  |                     |                     |                   |              |               |
| <i>abingdoni</i>    | 0.92           | 0.98              | 0.98             | 0.91           | 0.93         | 0.00             |                  |                     |                     |                   |              |               |
| <i>ephippium</i>    | 0.90           | 0.96              | 0.96             | 0.84           | 0.91         | 0.95             | 0.00             |                     |                     |                   |              |               |
| <i>chathamensis</i> | 0.91           | 0.99              | 1.00             | 0.92           | 0.92         | 0.98             | 0.96             | 0.00                |                     |                   |              |               |
| <i>vandenburghi</i> | 0.93           | 0.99              | 0.99             | 0.85           | 0.93         | 0.98             | 0.95             | 0.99                | 0.00                |                   |              |               |
| <i>microphyes</i>   | 0.92           | 0.99              | 0.99             | 0.81           | 0.92         | 0.98             | 0.94             | 0.99                | 0.67                | 0.00              |              |               |
| <i>nigra</i>        | 0.86           | 0.94              | 0.96             | 0.70           | 0.88         | 0.94             | 0.89             | 0.95                | 0.90                | 0.88              | 0.00         |               |
| <i>vicina</i>       | 0.85           | 0.88              | 0.89             | 0.74           | 0.87         | 0.89             | 0.85             | 0.89                | 0.27                | 0.36              | 0.71         | 0.00          |
